# Supplementary material
Source: PubMed Central journal article supplement (PMC2919919)
Supplement: 1007586107_st06.pdf [file 1007586107_st06.pdf]

Table S6. Species-specific primers used to validate trans-splicing of candidate genes

| Primer       | Sequence                                | Annotation Symbol |
|--------------|-----------------------------------------|-------------------|
| SxIRH_sim_R6 | CACCGTTACTGGTGAAAGCA                    | CG18350           |
| SxIRH_sim_R5 | GGGATTGTTGGTAAAGTTGCTACT                | CG18350           |
| SxIRH_sim_R4 | GCACCGTTACTGGTGAAAGCA                   | CG18350           |
| SxIRH_sec-R3 | CCGTTGCTGTTGGTGTAAATTAC                 | CG18350           |
| SxIRH_sec-R2 | AATTAATGGCAAAGTGGCCACTA                 | CG18350           |
| SxIRH_sec-R1 | GTGTTCGTCGTGTTAATGTTATTG                | CG18350           |
| SxIRH_sec-F2 | GCGTGGTTCAGCTAATGTC                     | CG18350           |
| SxIRH_sec_F1 | ACGGCCAAGGCGAAGGCT                      | CG18350           |
| SxIRH_mel-R3 | CCGTTGCTGTTGGTGTAAATTGT                 | CG18350           |
| SxIRH_mel-R2 | AATTACTGGCAAAGTGTCCACTG                 | CG18350           |
| SxIRH_mel-R1 | GTGTTCGACGTGTTAATGTTATTA                | CG18350           |
| SxIRH_mel-F2 | GCGTGGTTCAGCAAATGTA                     | CG18350           |
| SxIRH_mel-F1 | CATGGCAAGGCGAAGGCG                      | CG18350           |
| SxIRH_mel_R5 | GATTGTTGGGAAAGTTGCTACC                  | CG18350           |
| SxIRH_mel_R4 | GCACCGTTACTGGTAAAAGCG                   | CG18350           |
| SP1173-SecF  | GGGAAAATATATCGAAACGGTGT                 | CG10121           |
| SP1173-MelR  | TCGGTTACTACAACTATCTATATAAAAATCTCAGTAATA | CG10121           |
| SP1173-MelF  | GGAAAATATATCGAAACCGTGC                  | CG10121           |
| SP1173_SecR  | CGGTTACTACAAGCTATCTATATAAAAATCTCAGTAATT | CG10121           |
| Ps_SecR      | GTTGCTTTGCTTCTGGTTTATTTT                | CG16765           |
| Ps_SecF      | GCGAATAACGAGTAAAAGTTAAAAAGTTG           | CG16765           |
| Ps_MelR      | TGCTGTGCTTCTGGTTTTTTTT                  | CG16765           |
| Ps_MelF      | CGCATAACGAGTAAAAGTTAAAAAGTCA            | CG16765           |
| ome-SecR     | CGTGGCCAACAGAGCAAG                      | CG42280(CG32145)  |
| ome-SecF     | GCGGATCCGGATTCCCTT                      | CG42280(CG32145)  |
| ome-MelR     | CCGTGGCCAATAGAGCAAC                     | CG42280(CG32145)  |
| ome-MelF     | GCGGATCCGGATTCCCTC                      | CG42280(CG32145)  |
| Fau_SecR2    | GAGGTTACCACGCGGATC                      | CG6544            |
| Fau_SecR1a   | CCGCTGGTGGTTCGAG                        | CG6544            |
| Fau_SecR1    | CTTTGACGCAGTGCCTCC                      | CG6544            |
| Fau_SecF2a   | AAAATCCAACGAACAATTCTATT                 | CG6544            |
| Fau_SecF2    | CCAAAATCCAACGAACAATTCTATC               | CG6544            |
| Fau_SecF1    | CAAAGCATCCAAATCTAAAAATCG                | CG6544            |
| Fau_MelR2    | GAGGTTACCACGCGGATG                      | CG6544            |
| Fau_MelR1a   | CCGCTGGTGGTTCGAA                        | CG6544            |
| Fau_MelR1    | CCTTTGACGCTGTGCGTCT                     | CG6544            |
| Fau_MelF2    | CCAAAATCCAACGAACAATTCTATT               | CG6544            |
| Fau_MelF1    | TCTCAAAGCATCCAAATCTAAAAATCT             | CG6544            |
| CG9432-SR    | ATCTTCTCAAACATCTTGCGGTTT                | CG9432            |
| CG9432-SF    | CAACGACAAACGACTAGCCAAAG                 | CG9432            |
| CG9432-MR    | CTTCTCGAACATCTTGCGGTTA                  | CG9432            |
| CG9432-MF    | CAACGACAAACGACTAGCCAAA                  | CG9432            |
| CG7449-SR2   | ATCCTTGGTCCACTGGACTTTT                  | CG7449            |
| CG7449-SR1   | CCGCCCGGTTTCGAC                         | CG7449            |
| CG7449-SF    | CCAAGCCTAGAATTGGCTAGAGC                 | CG7449            |
| CG7449-MR2   | CCTTGGTCCACTGGACTTTG                    | CG7449            |
| CG7449-MR1   | CCGCCCGGTTTCGAT                         | CG7449            |

|             |                                      |         |
|-------------|--------------------------------------|---------|
| CG7449-MF   | CAAGCCTAGAATTGGCTGGAGT               | CG7449  |
| CG7437-SR   | TCTGTATCGCAGCAGTTGTTG                | CG7437  |
| CG7437-SF   | GTGAAGTAACATTCCGGCAAG                | CG7437  |
| CG7437-MR   | GTCTGTATCGCAGCAGTTGTCT               | CG7437  |
| CG7437-MF   | GTGAAGTAACAATCCGGCAAA                | CG7437  |
| CG5803-SR2  | CGCCTTTTGAGATTTTGTGCAT               | CG5803  |
| CG5803-SR1  | CCTCCGGTGTTGTTGTTGC                  | CG5803  |
| CG5803-SF   | GCTACTCCGCGTATGAGCCT                 | CG5803  |
| CG5803-MR2  | GCGCCTTTTGAGATTTGTGTAAC              | CG5803  |
| CG5803-MR1  | CTCCGGCGTTGTTGTTGT                   | CG5803  |
| CG5803-MF   | TACTCGGCGTATGAGCCG                   | CG5803  |
| CG42235-SR3 | GCCAAAATGGAACCAAACATC                | CG42235 |
| CG42235-SR2 | CCGCCCTCCTGATTGATT                   | CG42235 |
| CG42235-SR1 | GCAAATAAACTGGTCAGGGGT                | CG42235 |
| CG42235-SF  | CATTTCCGGGAGCCATTTCA                 | CG42235 |
| CG42235-MR3 | GCCAAAATGGAACCAAACATA                | CG42235 |
| CG42235-MR2 | CGTCCGCCCTCTTGATTAATC                | CG42235 |
| CG42235-MR1 | AATACAAATAAACTTGTACGGGC              | CG42235 |
| CG42235-MF  | CCATTTCCGGGAGCTATTTCCG               | CG42235 |
| CG32062-SR  | GTCAATCCTCCGGCGTT                    | CG32062 |
| CG32062-SF  | GATAAATAATCAAAAATTCAAATCAAATTGAAAT   | CG32062 |
| CG32062-MR  | GTCAATCCTCCGGCTGC                    | CG32062 |
| CG32062-MF  | GATAAATAATTAATAAAATTCAAATCAAATTGCAAG | CG32062 |
| CG32045-SR  | CACGCACATCCTCCCGT                    | CG32045 |
| CG32045-SF  | GCTGTCCTCGAGTGGAGGTG                 | CG32045 |
| CG32045-MR  | GCACGCACATCCTCTCGA                   | CG32045 |
| CG32045-MF  | GGCTGTCCTCGAGTTGAGGTT                | CG32045 |
| CG31324-SR  | CCGAGTAGCGGTCCTCGTT                  | CG31324 |
| CG31324-SF  | AAACAAATAGGAAAATATACGGAAAATAAAAGC    | CG31324 |
| CG31324-MR  | CGAGTAGCGGTCGTCTGC                   | CG31324 |
| CG31324-MF  | GAAAACAAATACGAAAAATACAGAAAATAAGAAG   | CG31324 |
| CG18466-SR  | CTCGTTGATGTGCTCTGGC                  | CG18466 |
| CG18466-SF  | GCTTACAATATTTAACGAGCTTAAAAGTGTATC    | CG18466 |
| CG18466-MR  | CTCATTGATGTGCTCGGGT                  | CG18466 |
| CG18466-MF  | GTGTTGCAATATTTAACGAGCTTAAAAGTATATT   | CG18466 |
| CG1637_SecR | CCAGATCCTTCAGCTCCACC                 | CG1637  |
| CG1637_SecF | GACTGTGTTACAGTGCAATAACAAC            | CG1637  |
| CG1637_MelR | TCCAGATCCTTCAGTTCCACA                | CG1637  |
| CG1637_MelF | GCGTTACTGTGCAACAACAAC                | CG1637  |
| CG15899-SR  | CGAATCGTTCGTATGGCAGTT                | CG15899 |
| CG15899-SF  | GGGCGCTGACGCAATATC                   | CG15899 |
| CG15899-MR  | CGAATCGTTCGTATGGCAGTC                | CG15899 |
| CG15899-MF  | GGCGCTGACGCAGTACA                    | CG15899 |
| CG14080-SR  | CTAAGACCCATTAGCTGATCGGTC             | CG14080 |
| CG14080-SF  | TGGCTGCAGTCGCAGC                     | CG14080 |
| CG14080-MR  | CCTAAGACCCATTAAGTATCGGTT             | CG14080 |
| CG14080-MF  | GAGTGGCTGCAGTCCAGT                   | CG14080 |
| CG12789-SR  | CACGCTGGGCTGGGATA                    | CG12789 |
| CG12789-SF  | GGCCTCTGGCAAAGAAATCC                 | CG12789 |

|              |                             |         |
|--------------|-----------------------------|---------|
| CG12789-MR   | CTCACGCTGGGCGATG            | CG12789 |
| CG12789-MF   | GGCCTCTGTGCAAAGAAATCA       | CG12789 |
| Lola_MelF    | GGACCAAACCTCGGCCAC          | CG12052 |
| Lola_SecF    | GGACCAAACCTCCGCCAG          | CG12052 |
| Lola_RF_MelR | GGAGAACTTGAGCTCGTACCAA      | CG12052 |
| Lola_RF_SecR | CGGAGAACTTGAGTTCGTACCAG     | CG12052 |
| Lola_RJ_MelR | CCCGGTTCGAATTTGATC          | CG12052 |
| Lola_RJ_SecR | CCCGGTTCGAACTTGATG          | CG12052 |
| Mod_melF     | GCTACGACGACAGCTACTTCACT     | CG32491 |
| Mod_SecF     | GCTACGACGATAGCTACTTCACG     | CG32491 |
| Mod_RAA_MelR | CGGATTGATTTTATTGACTTTATGTGA | CG32491 |
| Mod_RAA_SecR | GGATTGATTTTATTGACTTGATATGG  | CG32491 |
| Mod_RJ_MelR  | AAAGTCGGCCGGTTTTAATATG      | CG32491 |
| Mod_RJ_SecR  | AAAGTCGGCCGATTTTCATATA      | CG32491 |
